# Supplementary material for: Quantitation of a Urinary Profile of Biomarkers in Gaucher Disease Type 1 Patients Using Tandem Mass Spectrometry
Source: MDPI journal article supplement (doi:10.3390/diagnostics12061414), 2022-06-08
Supplement: s1 [file s1]

**A)**

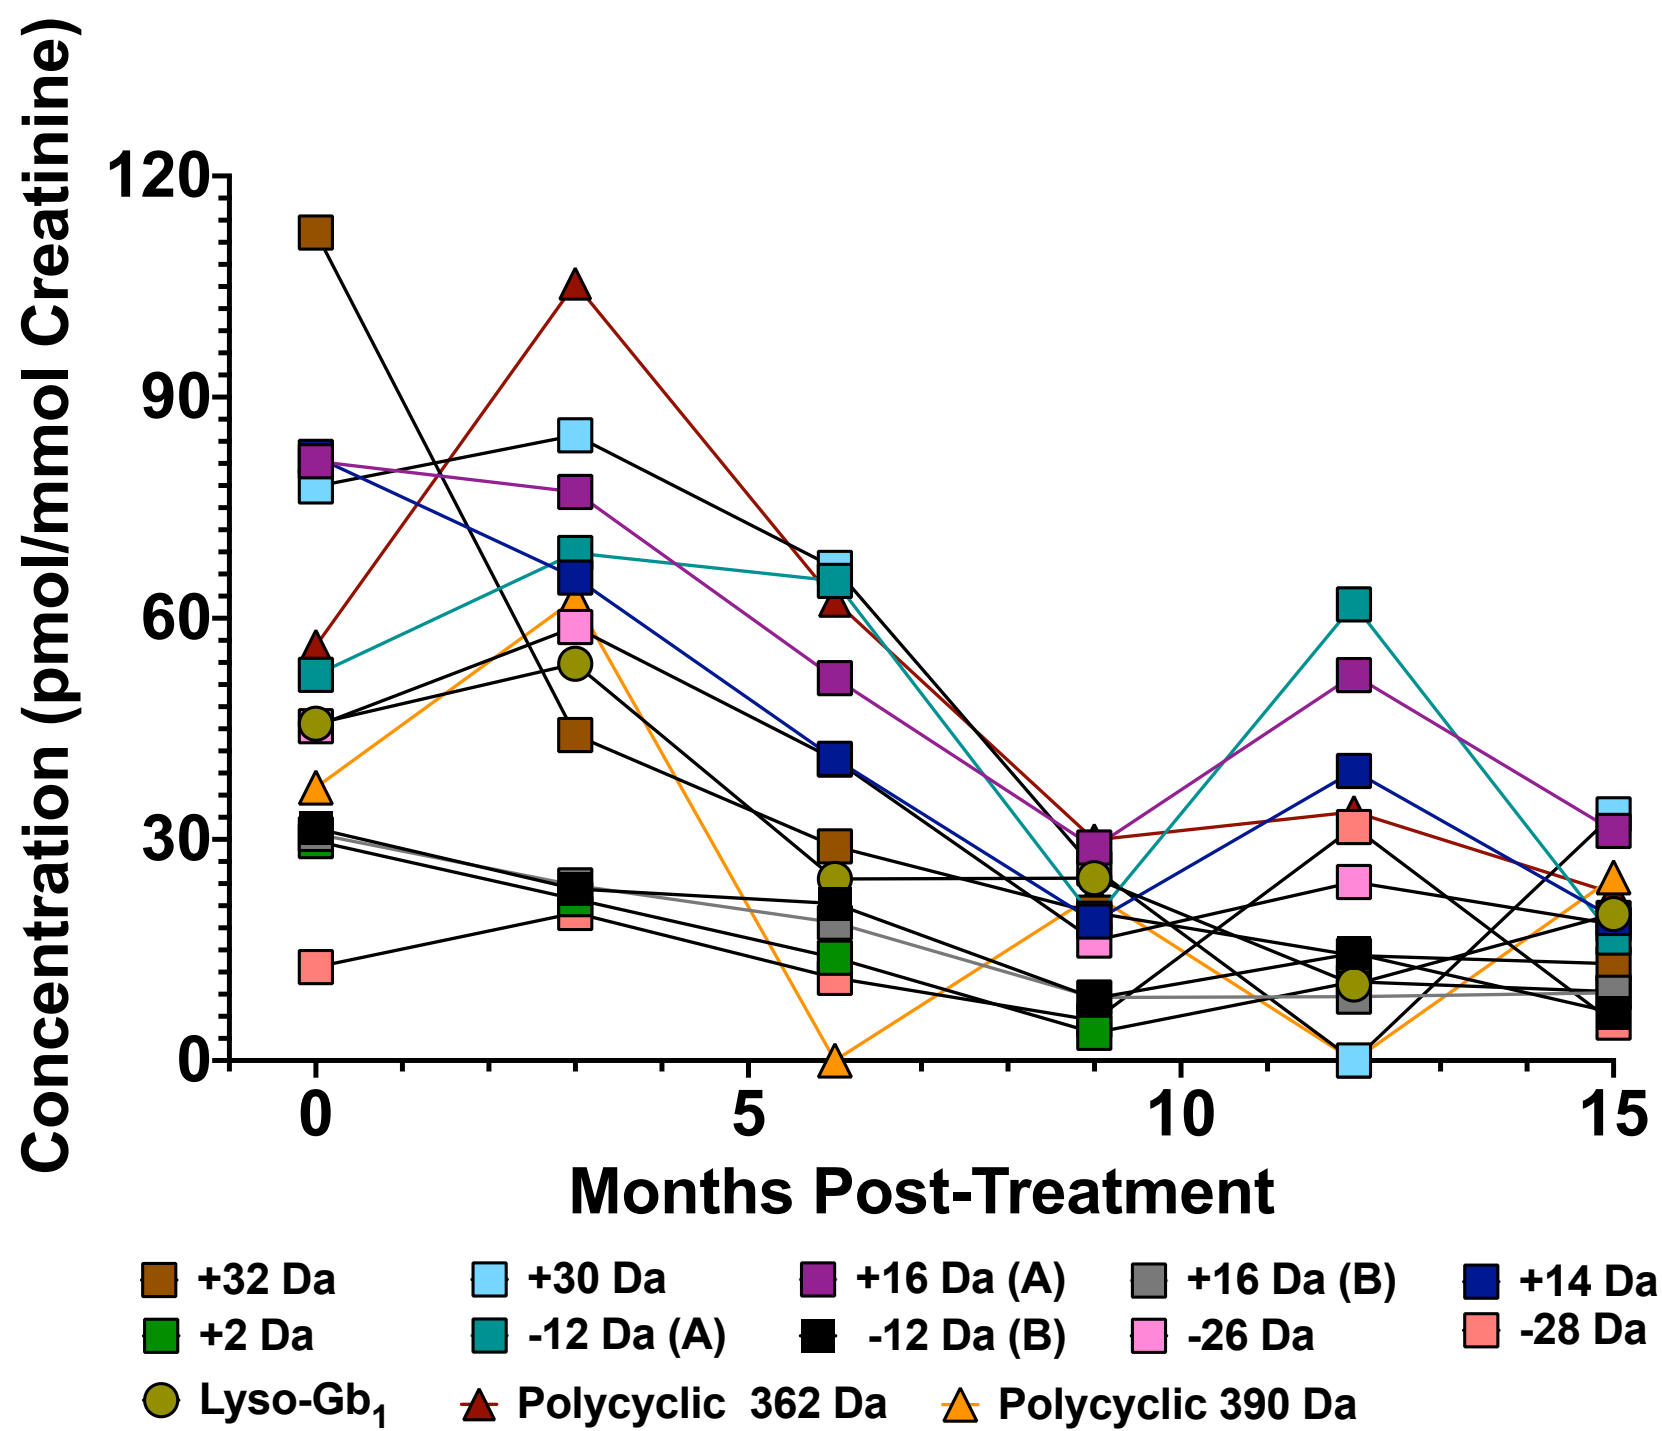

**B)**

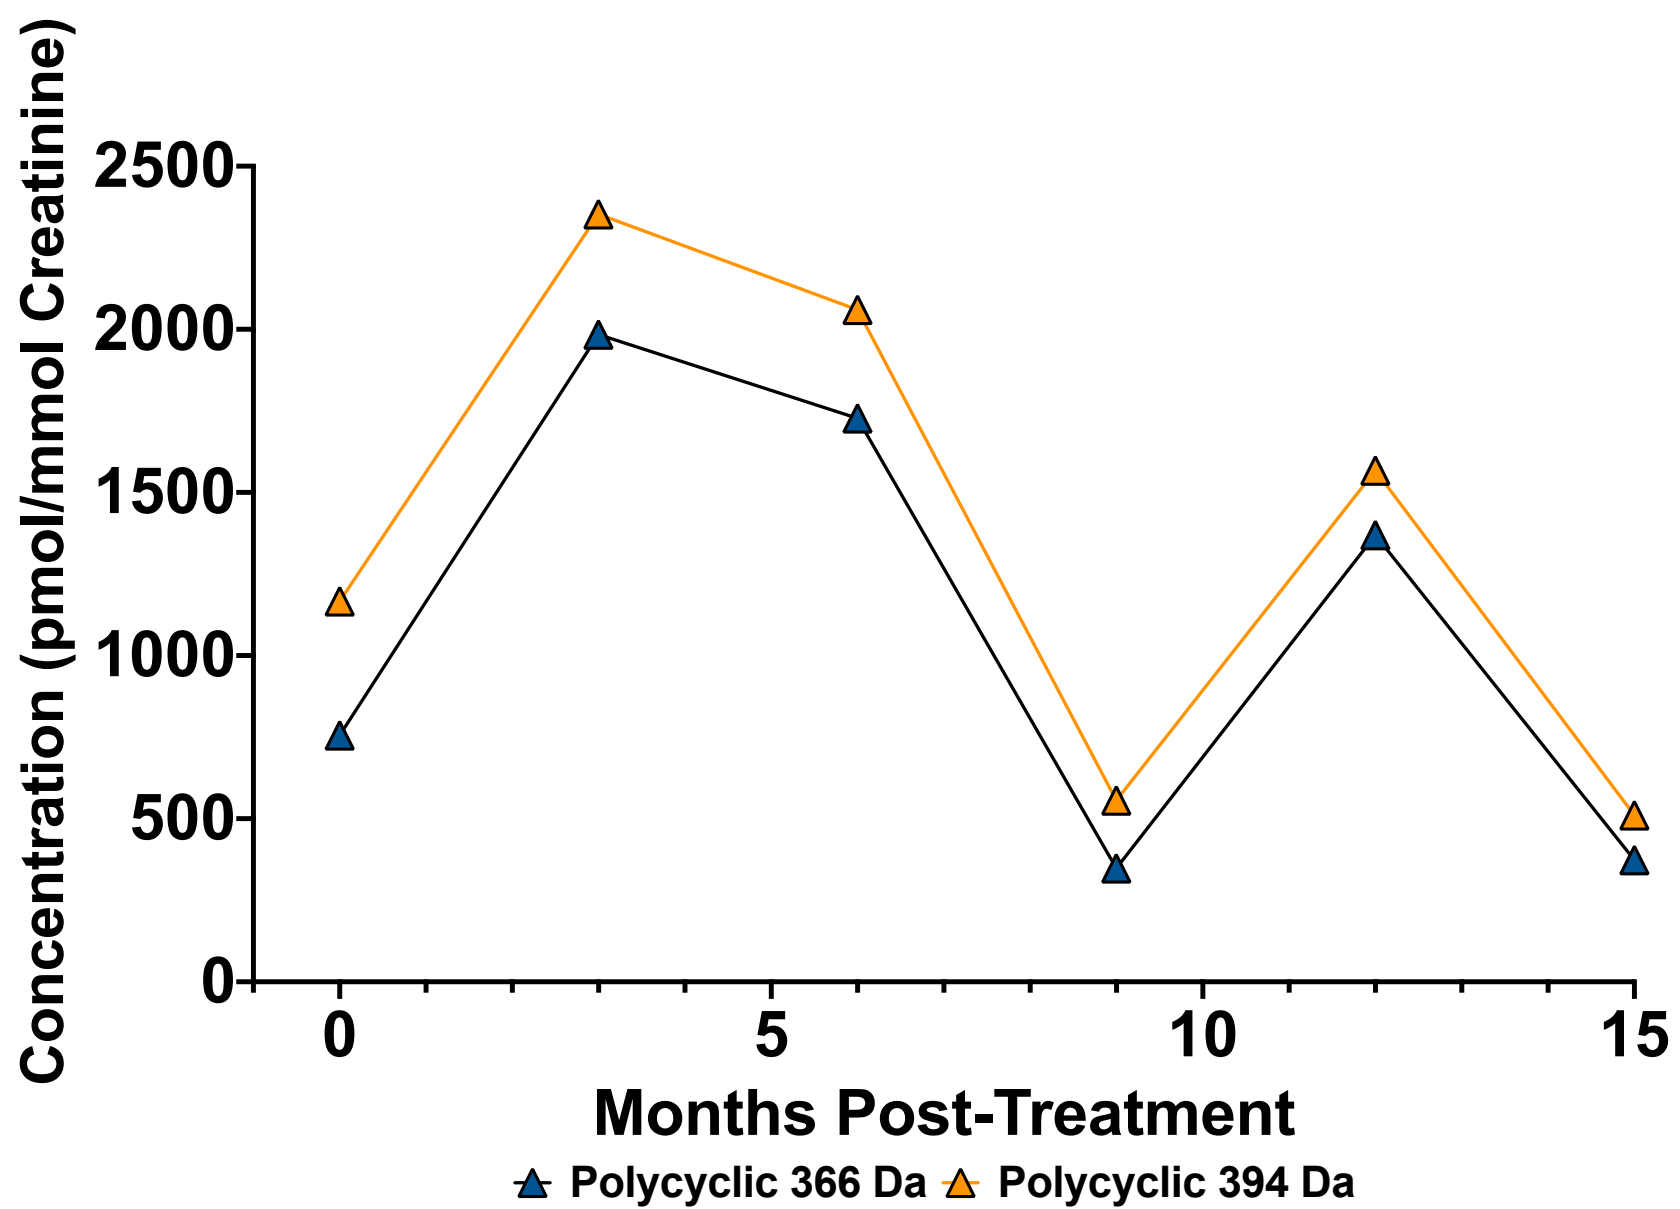

**Supplementary Figure S3.** Biomarker level variations following ERT treatment in a 18-year-old male GD type 1 patient with p.N370S/D409H mutations. A) Concentration variation post-ERT for lyso-Gb<sub>1</sub>, lyso-Gb<sub>1</sub> analogs +32, +30, +16 (A), +16 (B), +14, +2, -12 (A) and (B), -26, and -28 Da, as well as polycyclic analogs 390, and 362 Da post-ERT; B) Concentration variation levels post-ERT for polycyclic lyso-Gb<sub>1</sub> 394 and 366 Da.
