# Supplementary material for: Quantitation of a Urinary Profile of Biomarkers in Gaucher Disease Type 1 Patients Using Tandem Mass Spectrometry
Source: MDPI journal article supplement (doi:10.3390/diagnostics12061414), 2022-06-08
Supplement: s1 [file s1]

A)

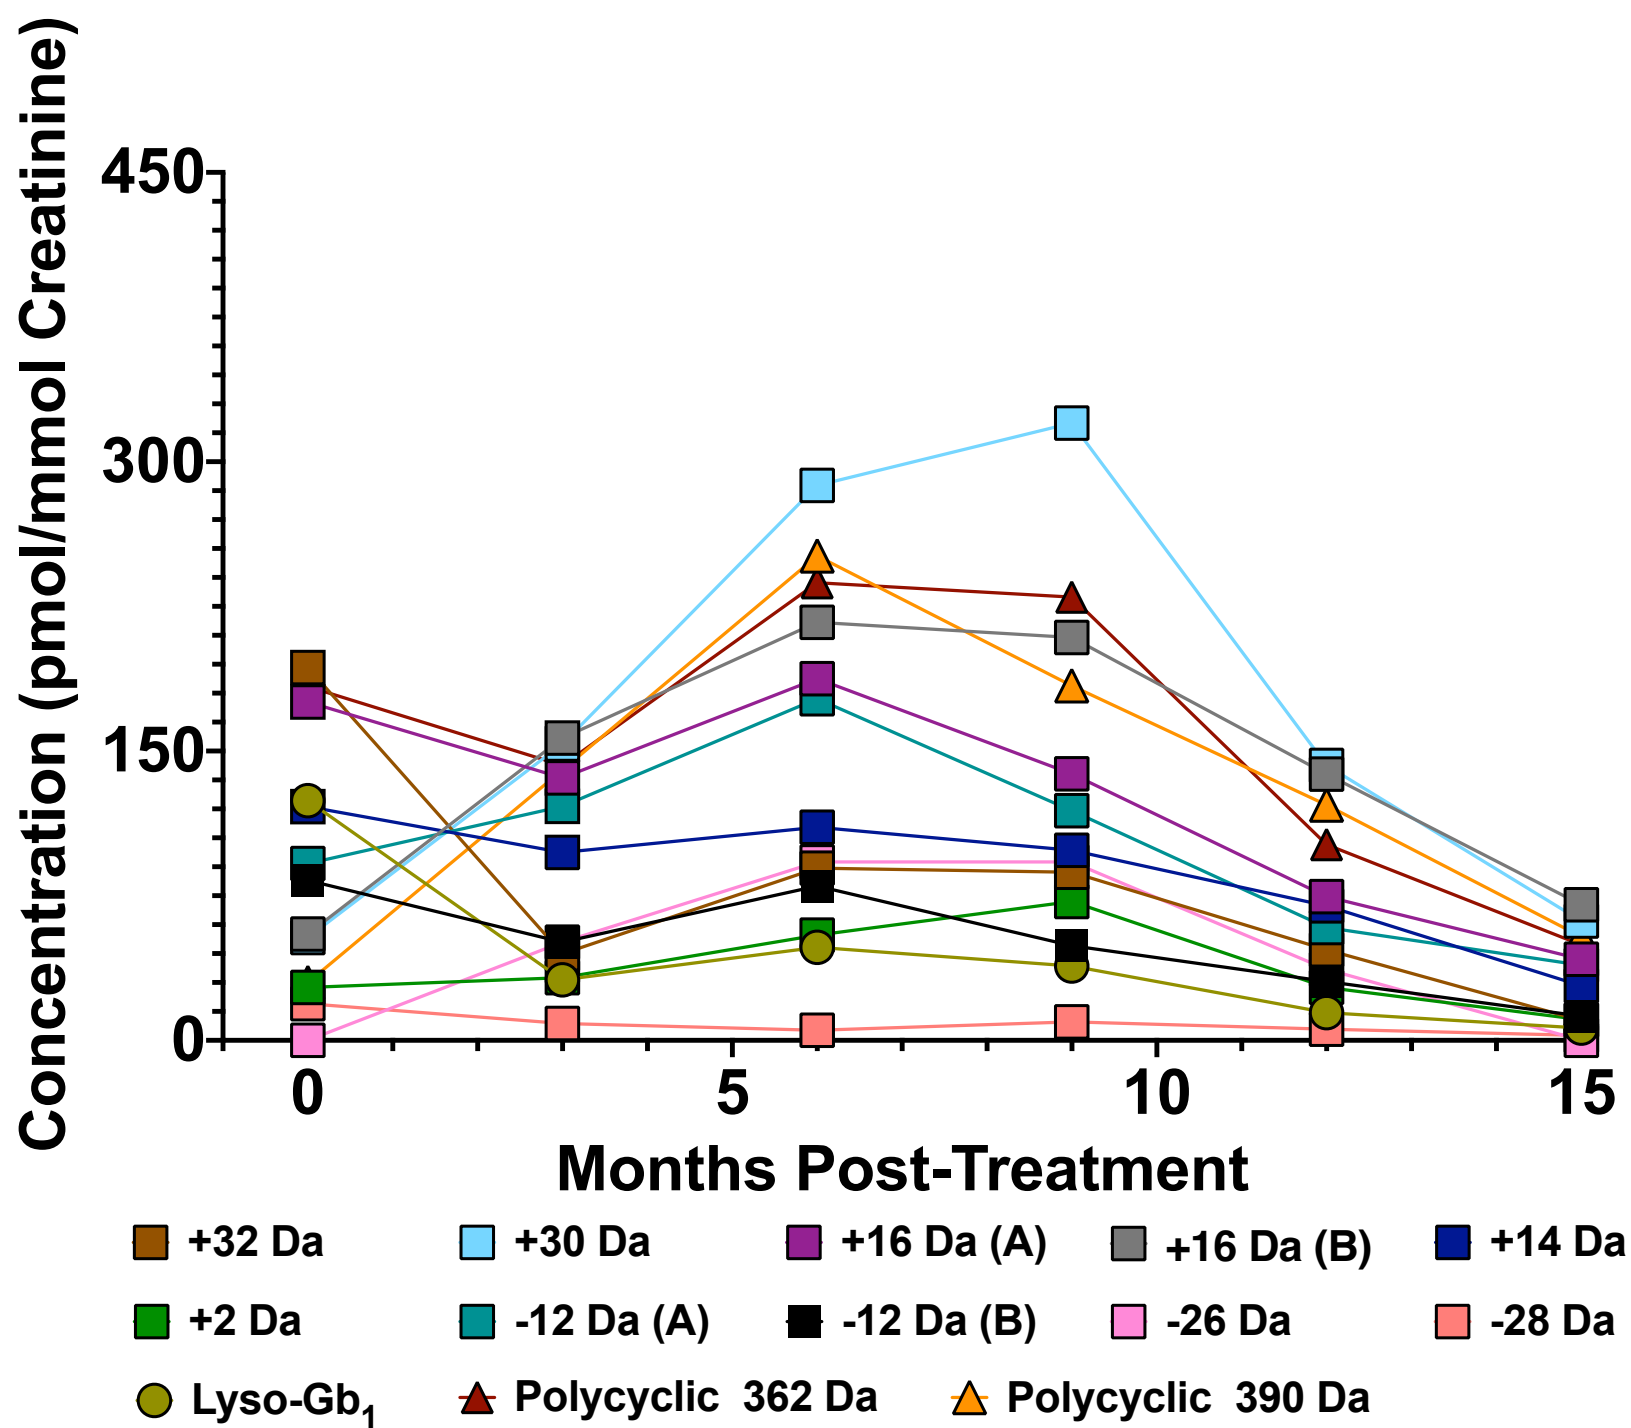

B)

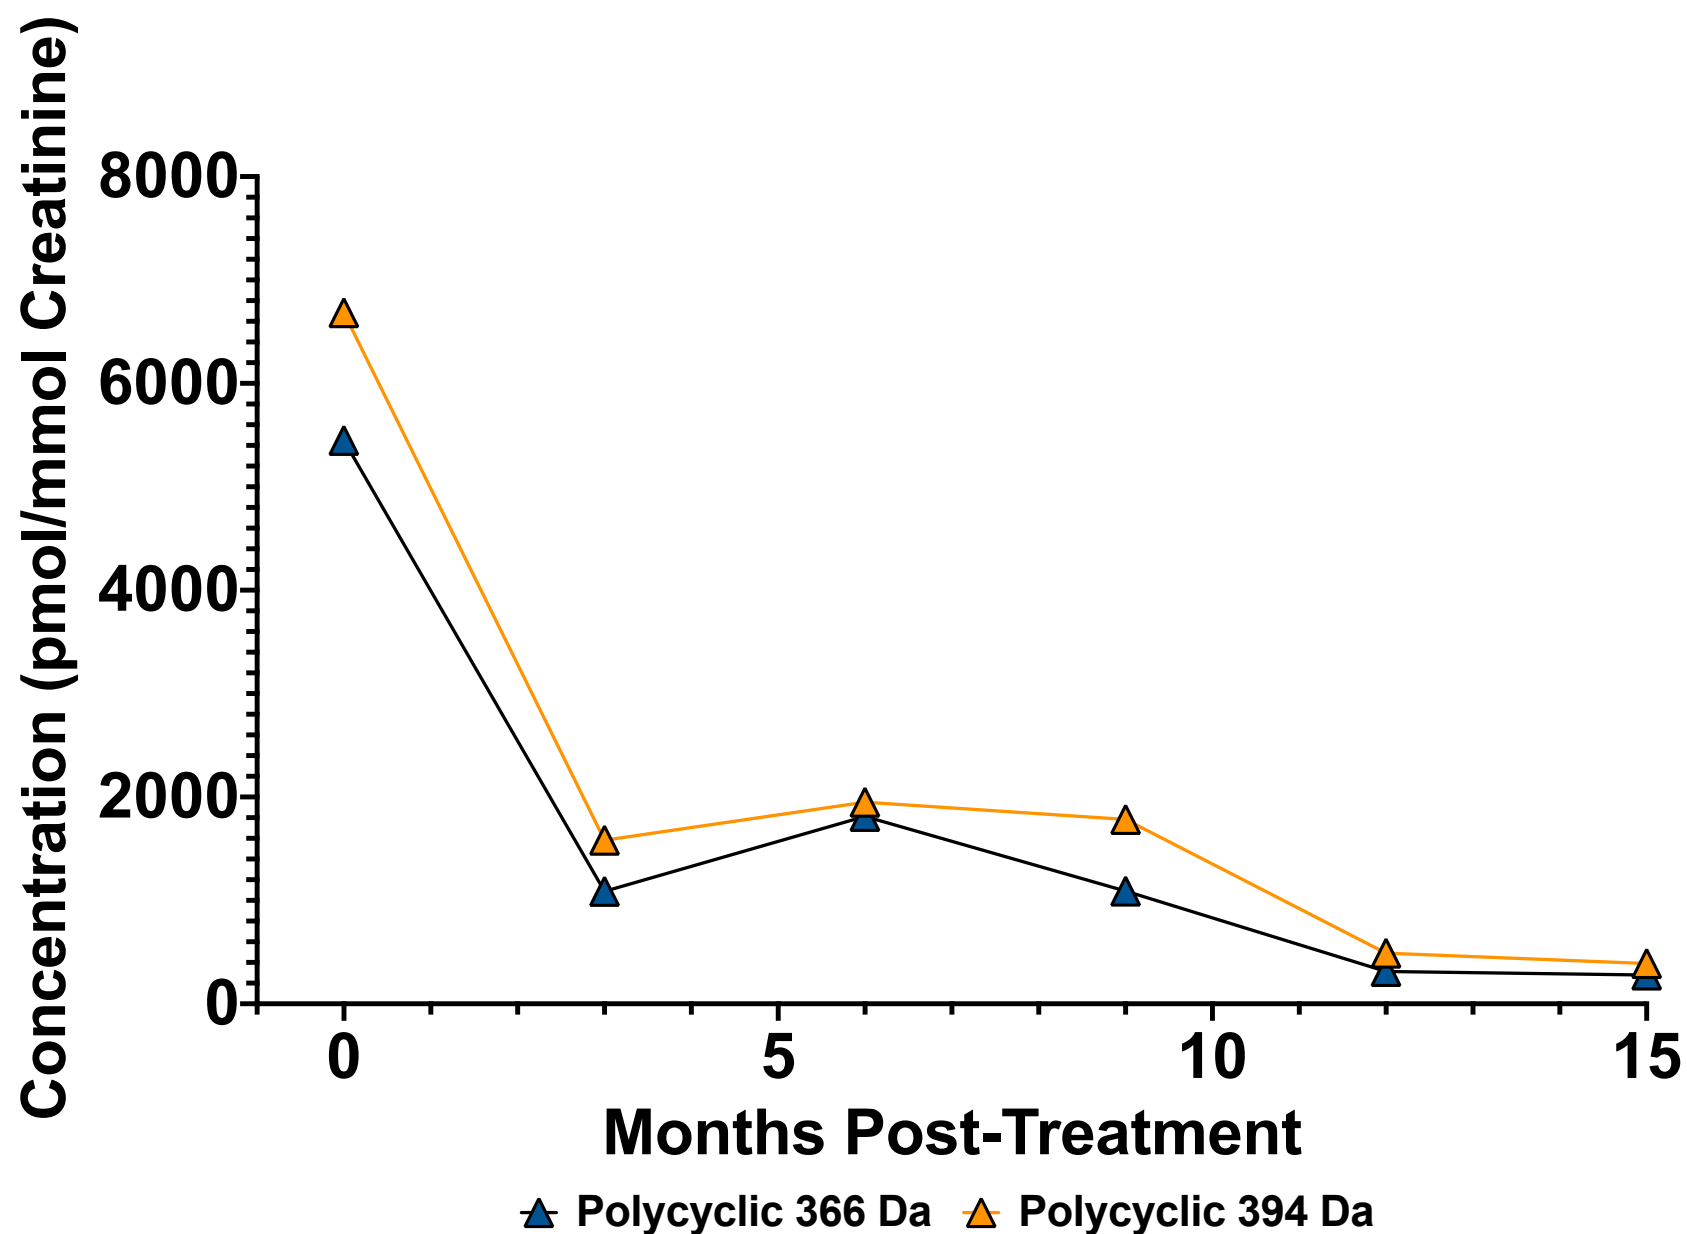

**Supplementary Figure S2.** Biomarker level variation following ERT treatment in a 55-year-old male GD type 1 patient p.N370S/D409H mutations. A) Concentration variation levels post-ERT for lyso-Gb<sub>1</sub>, lyso-Gb<sub>1</sub> analogs +32, +30, +16 (A), +16 (B), +14, +2, - 2 (A) and (B), -26, and -28 Da, as well as polycyclic analogs 362, and 390 Da; B) Concentration variation levels post-ERT for polycyclic lyso-Gb<sub>1</sub> 366 and 394 Da.
