# Supplementary material for: Quantitation of a Urinary Profile of Biomarkers in Gaucher Disease Type 1 Patients Using Tandem Mass Spectrometry
Source: MDPI journal article supplement (doi:10.3390/diagnostics12061414), 2022-06-08
Supplement: s1 [file s1]

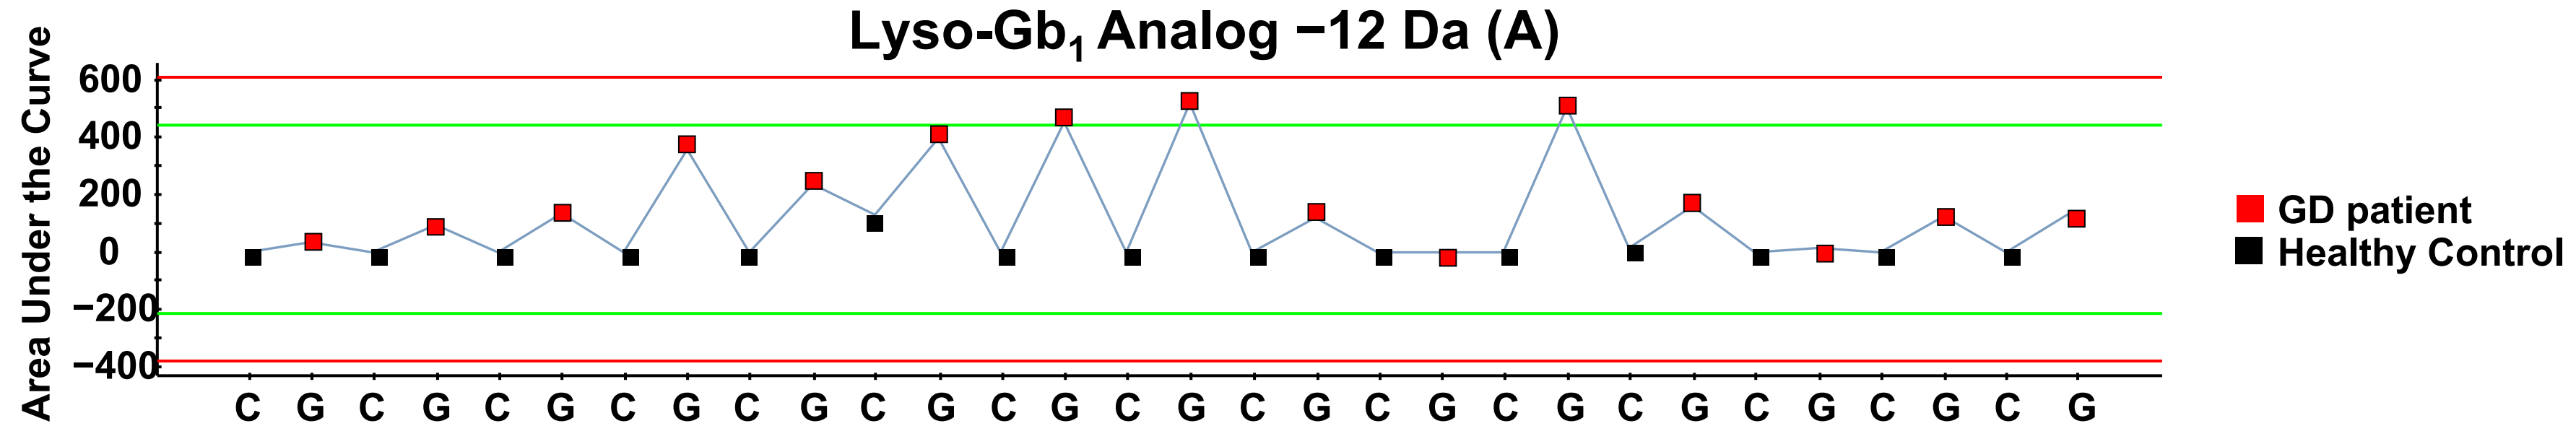

**Supplemental Figure S1.** Trendplot showing the relative distribution of lyso-Gb<sub>1</sub> analog -12 Da (A) with a retention time of 5.92 min in the different samples analyzed during the metabolomic study. The red square indicates a GD patient (n=15) and a black square indicates a healthy control (n=15). The red line indicates two standard deviations while the green line indicates one standard deviation.
